# Supplementary material for: Ag@NiO/g-C3N4 nanocomposite: an efficient and high-performance electrochemical sensor for acetaminophen detection
Source: Royal Society of Chemistry journal article supplement (doi:10.1039/d4nj05527f), 2025-01-01
Supplement: d4nj05527f1.pdf [file d4nj05527f1.pdf]

## Supporting information

**Ag@NiO/g-C<sub>3</sub>N<sub>4</sub> nanocomposite: An efficient and high-performance electrochemical sensor for acetaminophen detection**

**Kanagaraj Narayanan<sup>1,a</sup>, Krishnan Senthil Murugan<sup>1\*</sup>, Thillai Sivakumar Natarajan<sup>2,3\*</sup>**

<sup>1</sup>PG & Research Department of Chemistry, Sri Paramakalyani College, Alwarkurichi-627412, Affiliated to Manonmaniam Sundaranar University, Tirunelveli, Tamil Nadu, India.

<sup>2</sup>Environmental and Clean Energy Research Group, Environmental Science Laboratory, CSIR-Central Leather Research Institute (CSIR-CLRI), Adyar, Chennai-600 020, Tamil Nadu, India.

<sup>3</sup>Academy of Scientific and Innovative Research (AcSIR), Ghaziabad 600113, Uttar Pradesh, India.

Corresponding authors

Dr. Krishnan Senthil Murugan

E-mail: [ksmspkc@gmail.com](mailto:ksmspkc@gmail.com)

Dr. Thillai Sivakumar Natarajan

[thillai@clri.res.in](mailto:thillai@clri.res.in); [tsknatarajan@gmail.com](mailto:tsknatarajan@gmail.com)

<sup>a</sup> Research Scholar (Reg. No.: 21214012031016)

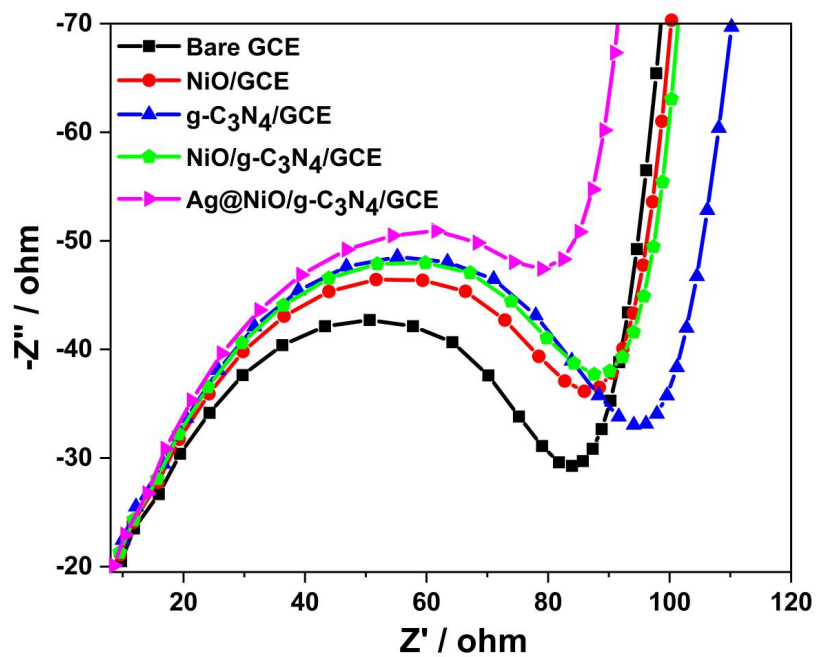

**Figure S1.** Electrochemical impedance spectroscopy (EIS) of 5.0 mM  $[\text{Fe}(\text{CN})_6]^{3-/4-}$  containing 0.1M KCl at bare GCE, NiO/GCE, g-C<sub>3</sub>N<sub>4</sub>/GCE, NiO/g-C<sub>3</sub>N<sub>4</sub>/GCE, Ag@NiO/g-C<sub>3</sub>N<sub>4</sub>/GCE

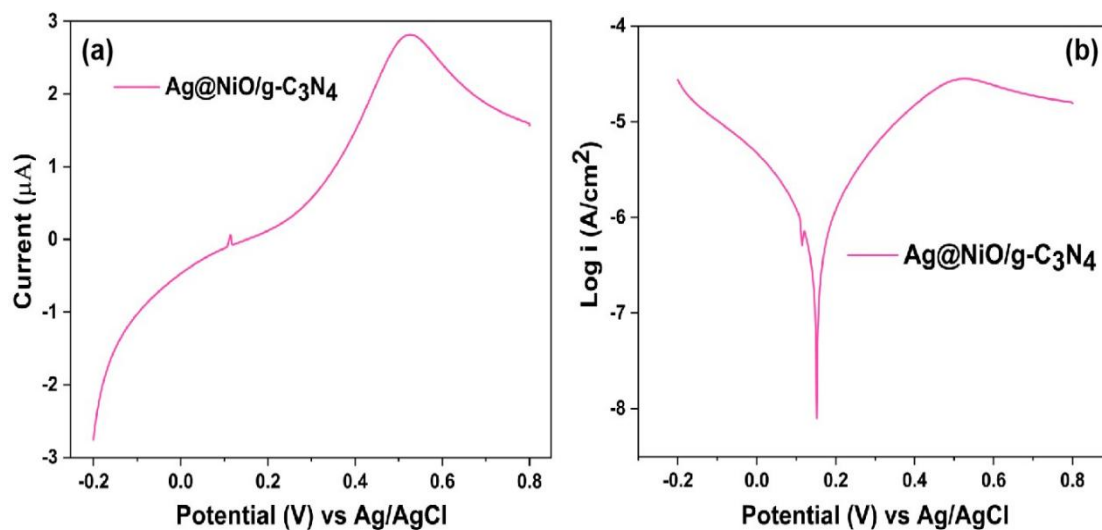

**Figure S2.** Tafel plots for acetaminophen oxidation of (a) Potential (V) vs. Current(μA) and (b) Potential (V) vs. Log I (A/cm<sup>2</sup>) using Ag@NiO/g-C<sub>3</sub>N<sub>4</sub> nanocomposite
